# Supplementary material for: Human protein secretory pathway genes are expressed in a tissue-specific pattern to match processing demands of the secretome
Source: PubMed Central journal article supplement (PMC5562915; doi:10.1038/s41540-017-0021-4), 2017-08-18
Supplement: 41540_2017_21_MOESM5_ESM.pdf [file 41540_2017_21_MOESM5_ESM.pdf]

FIGS4

A

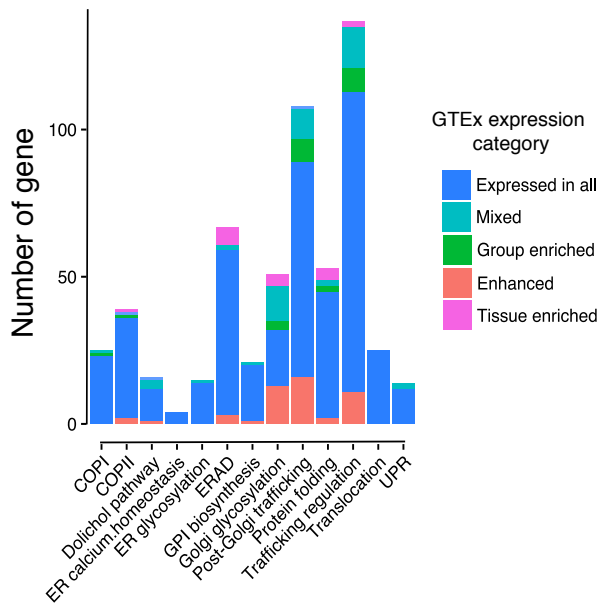

B

| Gene    | Tissue | Subsystem              |
|---------|--------|------------------------|
| CRYAA   | kidney | Protein folding        |
| UBQLNL  | testis | ERAD                   |
| DNAJC5B | testis | Protein folding        |
| TBC1D21 | testis | Trafficking regulation |
| UBQLN3  | testis | ERAD                   |
| ATXN3L  | testis | ERAD                   |
| GLT6D1  | testis | Golgi glycosylation    |
| DNAJC5G | testis | Protein folding        |
| HSPA4L  | testis | ERAD                   |
| HSPA1L  | testis | ERAD                   |
| GALNTL5 | testis | Golgi glycosylation    |
| FAM71B  | testis | Trafficking regulation |
