# Supplementary material for: Human protein secretory pathway genes are expressed in a tissue-specific pattern to match processing demands of the secretome
Source: PubMed Central journal article supplement (PMC5562915; doi:10.1038/s41540-017-0021-4), 2017-08-18

FIGS7

PDIA2

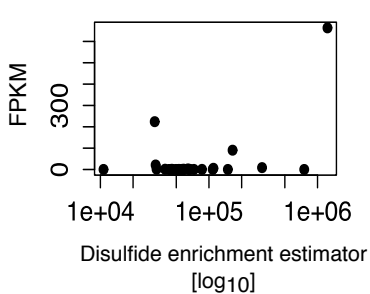

ERP27

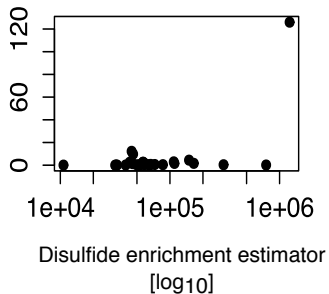

PDIA5

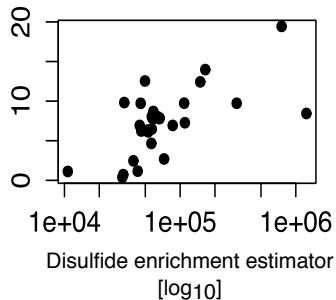

PDIA3

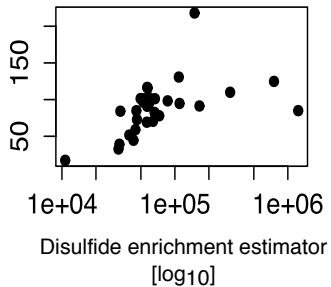

Supplement: 41540_2017_21_MOESM8_ESM.pdf [file 41540_2017_21_MOESM8_ESM.pdf]
